# Supplementary material for: The Relationship Between Omega-3, Omega-6 and Total Polyunsaturated Fat and Musculoskeletal Health and Functional Status in Adults: A Systematic Review and Meta-analysis of RCTs
Source: Springer Nature journal article supplement (doi:10.1007/s00223-019-00584-3), 2019-07-25
Supplement: MOESM1 [file 16990472]

**Supplementary file for Abdelhamid et al, The relationship between omega-3, omega-6 and total polyunsaturated fat and musculoskeletal health and functional status in adults.**

**Additional table 1. Summary results tables for the omega-3 PUFA and musculoskeletal health outcomes**

| **Outcome assessed** | **Analysis** | **Number of studies (comparisons)** | **Number of participants** | **Effect size (95%CI)** | **I2 %** |
| --- | --- | --- | --- | --- | --- |
| Primary outcomes | | | | | |
| Fracture incidence (no of events) | Risk ratio, M-H, random effects | 1 | 126 | 0.16 (0.01, 3.91) | NA |
| BMD lumbar, g/cm2 | MD, IV, random effects | 4 (5) | 463 | 0.03 (-0.02, 0.07) | 72 |
| Low summary risk of bias (SA) | 2 | 205 | 0.01 (-0.06, 0.09) | 72 |
| Fixed effects (SA) | 4 (5) | 463 | 0.00 (-0.02, 0.01) | 72 |
| BMD femoral neck, g/cm2 | MD, IV, random effects | 4 (5) | 463 | 0.04 (-0.00, 0.08) | 71 |
| Low summary risk of bias (SA) | 2 | 205 | 0.01 (-0.02, 0.05) | 0 |
| Fixed effects (SA) | 4 (5) | 463 | 0.01 (-0.00, 0.03) | 71 |
| Total proximal femur BMD g/cm2 | MD, IV, random effects | 1 | 37 | 0.03 (-0.30, 0.36) | NA |
| Low summary risk of bias (SA) | 0 | 0 | NA | NA |
| Muscle mass (SMD) | SMD, IV, random effects | 7* | 476 | 0.38 (0.05, 0.70) | 67 |
| Low summary risk of bias (SA) | 0 | 0 | NA | NA |
| Fixed effects (SA) | 8* | 675 | 0.31 (0.13, 0.49) | 61 |
| Bone mass, kg | MD, IV, random effects | 1 | 37 | 0.2 (-2.8, 3.2) | NA |
| Low summary risk of bias (SA) | 0 | 0 | NA | NA |
| Measures of functional status | SMD, IV, random effects | 7* (9) | 4166 | -0.01 (-0.08, 0.06) | 10 |
| Low summary risk of bias (SA) | 3* (5) | 3756 | -0.01 (-0.09-0.10) | 44 |
| Fixed effects (SA) | 7* (9) | 4166 | -0.01 (-0.07, 0.05) | 10 |
| Secondary outcomes | | | | | |
| Osteocalcin, ug/l | MD, IV, random effects | 3 (4) | 213 | 2.03 (-2.31, 6.36)  Baseline ~18.9 ug/l | 55 |
| Bone-specific alkaline phosphatase, ug/l | MD, IV, random effects | 2 | 134 | -0.88 (-2.4, 0.64)  Baseline 21.2 ug/l | 0 |
| N-telopeptide of type 1 collagen (NTX/CR nM /BCE) | MD, IV, random effects | 1 | 116 | 0.29 (-1.00, 1.58)  Baseline 17.1 nM /BCE | NA |
| C-terminal telopeptide of type 1 collagen (CTX, ng/ml) | MD, IV, random effects | 2 (3) | 116 | -0.03 (-0.10, 0.04)  Baseline 0.47 ng/ml | 0 |
| Urinary PYD ng/ml | MD, IV, random effects | 1 | 18 | 1.53 (-117.63, 120.69)  Baseline 3.93 ng/ml | NA |
| Physical performance measures – hand grip | SMD, IV, random effects | 2 | 161 | 0.47 (0.09, 0.85) | 17 |
| Parathyroid hormone, pg/mL | MD, IV, random effects | 3 (4) | 313 | -3.85 (-18.53, 10.82)  Baseline ~ 75 pg/ml | 54 |

* Plus one study presented data that did not contribute to the meta-analysis

**Additional table 2. Summary results tables for the Omega-6 PUFA and musculoskeletal health outcomes***

| **Outcome assessed** | **Analysis** | **Number of studies (comparisons)** | **Number of participants** | **Effect size (95%CI)** | **I2 %** |
| --- | --- | --- | --- | --- | --- |
| Arm muscle strength (averaged x102)** | MD, IV, random effects | 1 | 84 | | 12.30 [4.50, 20.10] | | --- | | NA |
| Leg muscle strength (averaged x102)** | MD, IV, random effects | 1 | 84 | | 14.60 [2.17, 27.03] | | --- | | NA |

* No primary outcomes reported

** Units and direction of improvement are unclear as the paper describes the outcome as strength in some places and as weakness in others, scale appears to run from 0 to 2500 for arm strength, and 0 to 2000 for leg strength.

**Additional table 3. Summary results tables for the mixed PUFA and musculoskeletal health outcomes**

| **Outcome assessed** | **Analysis** | **Number of studies (comparisons)** | **Number of participants** | **Effect size (95%CI)** | **I2 %** |
| --- | --- | --- | --- | --- | --- |
| Primary outcomes | | | | | |
| BMD (SMD, using lumbar BMD) | SMD, IV, random effects | 3 | 245 | 0.15 (-0.21, 0.51) | 44 |
| Low summary risk of bias (SA) | 0 | 0 | NA | NA |
| Fixed effects (SA) | 3 | 245 | 0.09 (-0.17, 0.34) | 44 |
| BMD (SMD, using femoral BMD) | SMD, IV, random effects | 3 | 245 | 0.35 (-0.26, 0.96) | 79 |
| Low summary risk of bias (SA) | 0 |  |  | NA |
| Fixed effects (SA) | 3 | 245 | 0.19 (-0.06, 0.45) | 79 |
| BMD lumbar, g/cm2 | MD, IV, random effects | 1 | 60 | 0.07 (-0.03, 0.18) | NA |
| BMD femoral, g/cm2 | MD, IV, random effects | 1 | 60 | 0.07 (0.03, 0.10) | NA |
| Total BMD g/cm2 | MD, IV, random effects | 1 | 42 | 0.00 (-0.00, 0.01) | NA |
| Calcaneal BMD, g/cm2 | MD, IV, random effects | 1 | 143 | -0.01 (-0.04, 0.02) | NA |
| Muscle mass (MD) | MD, IV, random effects | 1 | 214 | -0.50 (-1.63, 0.63) | NA |
| Secondary outcomes | | | | | |
| Osteocalcin, ug/l | MD, IV, random effects | 3 | 195 | 0.52 (-1.99, 0.95)  Baseline ~12 ug/l | 45 |
| Bone-specific alkaline phosphatase, ug/l | MD, IV, random effects | 2 | 102 | 0.17 (-1.42, 1.75)  Baseline ~8 ug/l | 0 |
| Bone-specific alkaline phosphatase, % | MD, IV, random effects | 1 | 143 | 1.47 (-1.66, 4.60)  Baseline 41.2% | NA |
| Serum type 1 procollagen (C1NP or P1NP, ng/ml) | MD, IV, random effects | 1 | 93 | -16.6 (-65.28, 32.08)  Baseline 205.4 ng/ml | NA |
| Procollagen, ug/L | MD, IV, random effects | 1 | 60 | 1.24 (-20.15, 22.63)  Baseline 144.55 ug/l | NA |
| N-telopeptide of type 1 collagen (NTX/CR nM /BCE) | MD, IV, random effects | 1 | 42 | -4.35 (-14.28, 5.58)  Baseline 23.2 nM /BCE | NA |
| C-terminal telopeptide of type 1 collagen (CTX, ng/ml) | MD, IV, random effects | 1 | 93 | -0.10 (-0.24, 0.04)  Baseline 1.02 ng/ml | NA |
| Urinary hydroxyproline ɥmol/mmol Cr | MD, IV, random effects | 1 | 42 | -2.24 (-7.08, 2.6)  Baseline 14.3 ɥmol/mmol Cr | NA |
| Deoxypyridinoline: creatinine (nmol/nmol) | MD, IV, random effects | 2 | 203 | 0.28 (-0.23, 0.78)  Baseline 7.3 nmol/nmol | NA |
| Physical performance measures (leg extensor power in watts) | MD, IV, random effects | 1 | 42 | -8.00 (-23.80, 7.80)  Baseline 128 watts | NA |
| Parathyroid hormone, pg/mL | MD, IV, random effects | 3 | 246 | 4.70 (-0.43, 9.83)  Baseline 56.7 pg/ml | 41 |
